# Supplementary material
Source: MDPI journal article supplement (https://www.mdpi.com/2072-4292/12/14/2284)

0.125m@x2 large boulders

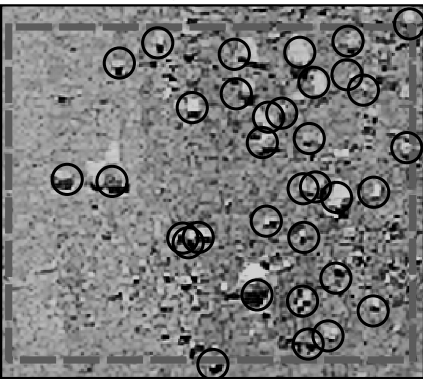

0.125m@x2 isolated boulders

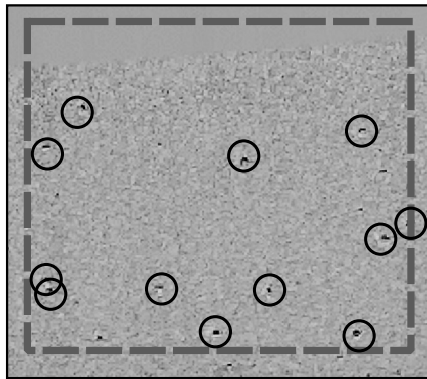

0.125m@x2 small boulders

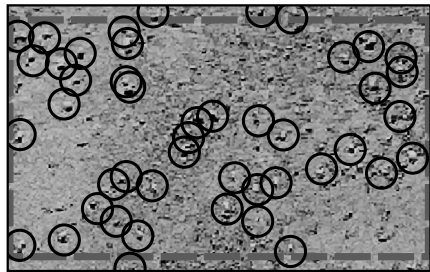

Supplement: s1 [file s1]
